# Supplementary material for: The Impact of the Urban Matrix on Arthropod Biodiversity and Ecosystem Services in Community Gardens
Source: Research Square preprint supplement (doi:10.21203/rs.3.rs-2949625/v1), 2023-05-23
Supplement: Supplementary file 1 [file ac43d85d06502a79cef9783a.docx]

## Structural Equation Model Components

**Supplement 1.**

**(Equation 1a)**

**(Equation 1b)**

**(Equation 1c)**

**(Equation 1d)**

**(Equation 1e)**

**(Equation 1f)**

***(Equation 1 correlated errors)***
