# Supplementary material for: The Impact of the Urban Matrix on Arthropod Biodiversity and Ecosystem Services in Community Gardens
Source: Research Square preprint supplement (doi:10.21203/rs.3.rs-2949625/v1), 2023-05-23
Supplement: Supplementary file 2 [file aff3861e9c741fb69b8d385c.docx]

## Structural Equation Model Output

**Supplement 2.** Standardized regression coefficient estimates, standard errors, degrees of freedom, critical values, and p-values. Arthropod data is from the month of August, and pepper mass and herbivory are for experimental exposed jalapeño pepper plants.

| Response | Predictor | Std.  Estimate | Std. Error | df | Critical Value | P-value |
| --- | --- | --- | --- | --- | --- | --- |
| BeeDiversity | WealthIndex | -0.951 | 0.034 | 29 | -20.197 | <0.001*** |
| BeeDiversity | ImpeviousSurface | -0.062 | 0.009 | 29 | -1.268 | 0.215 |
| BeeDiversity | PredatorAbundance | -0.044 | 0.021 | 29 | -0.856 | 0.399 |
| LnHerbivory | PollinatorAbundance | -0.003 | 0.007 | 27 | -0.418 | 0.679 |
| LnHerbivory | BeeDiversity | 0.115 | 0.158 | 27 | 0.727 | 0.473 |
| LnHerbivory | HerbivoreAbundance | -0.004 | 0.032 | 27 | -0.138 | 0.892 |
| LnHerbivory | PredatorAbundance | 0.095 | 0.090 | 27 | 1.051 | 0.303 |
| LnHerbivory | Greenhouse | - | - | 1 | 0.563 | 0.460 |
| LnHerbivory | GreenhouseMidroom | -2.532 | 0.090 | 27 | -28.179 | <0.001*** |
| LnHerbivory | GreenhouseBackroom | -2.427 | 0.099 | 27 | -24.453 | <0.001*** |
| PollinatorAbundance | WealthIndex | 0.212 | 0.055 | 29 | 1.615 | 0.106 |
| PollinatorAbundance | ImpeviousSurface | -0.613 | 0.015 | 29 | -4.716 | <0.001*** |
| PollinatorAbundance | PredatorAbundance | -1.026 | 0.035 | 29 | -7.170 | <0.001*** |
| LnPepperMass | LnHerbivory | -0.063 | 0.096 | 28 | -0.658 | 0.516 |
| LnPepperMass | PollinatorAbundance | 0.001 | 0.002 | 28 | 0.773 | 0.446 |
| LnPepperMass | BeeDiversity | 0.126 | 0.049 | 28 | 2.569 | 0.016* |
| LnPepperMass | Greenhouse | - | - | 1 | 8.395 | <0.01** |
| LnPepperMass | GreenhouseBackroom | 2.556 | 0.053 | 28 | 48.314 | <0.001*** |
| LnPepperMass | GreenhouseMidroom | 2.771 | 0.048 | 28 | 57.806 | <0.001*** |
| HerbivoreAbundance | WealthIndex | 0.355 | 0.055 | 29 | 3.092 | <0.01** |
| HerbivoreAbundance | ImpeviousSurface | 0.643 | 0.020 | 29 | 4.136 | <0.001*** |
| HerbivoreAbundance | PredatorAbundance | 0.082 | 0.042 | 29 | 0.546 | 0.585 |
| PredatorAbundance | WealthIndex | 0.330 | 0.088 | 30 | 1.746 | 0.081 |
| PredatorAbundance | ImpeviousSurface | -0.372 | 0.023 | 30 | -2.029 | 0.043* |
| ~~BeeDiversity | ~~HerbivoreAbundance | 0.790 | - | 33 | 7.065 | <0.001*** |
| ~~BeeDiversity | ~~PollinatorAbundance | -0.648 | - | 33 | -4.665 | <0.001*** |
| ~~HerbivoreAbundance | ~~PollinatorAbundance | -0.781 | - | 33 | -6.851 | <0.001*** |

## 
